# Supplementary material for: On Exploring Hidden Structures Behind Cervical Cancer Incidence
Source: Cancer Control. 2018 Sep 25;25(1):1073274818801604. doi: 10.1177/1073274818801604 (PMC6156216; doi:10.1177/1073274818801604)
Supplement: Supplemental Material, cervical2014 - On Exploring Hidden Structures Behind Cervical Cancer Incidence [file cervical2014.csv]

Vuosi	0-	35-	40-	45-	50-	55-	60-	65-	70-	75-	80+
1953	21	28	47	47	45	47	28	26	17	9	3
1954	19	36	65	56	49	42	32	25	15	5	6
1955	20	37	43	57	50	47	33	25	14	7	4
1956	23	54	63	54	65	41	39	16	19	5	3
1957	24	46	45	43	49	51	36	24	17	4	4
1958	13	38	53	55	65	51	33	23	21	12	1
1959	25	34	37	55	51	47	35	31	21	5	7
1960	14	42	39	49	85	45	35	34	20	12	7
1961	17	32	47	47	78	43	26	32	25	11	8
1962	13	37	51	63	78	58	50	29	24	7	15
1963	20	34	48	51	60	57	32	34	21	12	10
1964	18	22	61	67	61	75	34	25	28	10	8
1965	14	31	58	78	73	65	38	39	17	21	13
1966	16	37	50	67	76	62	51	35	25	12	6
1967	12	32	53	67	75	61	48	22	20	13	6
1968	19	32	37	60	63	49	44	28	21	19	13
1969	19	25	45	60	49	53	43	38	29	12	6
1970	10	12	32	56	49	46	46	26	36	15	12
1971	12	20	31	41	33	55	47	29	29	19	12
1972	9	13	24	43	39	44	39	44	18	13	9
1973	11	14	21	10	32	35	44	43	24	12	8
1974	13	10	12	24	24	31	50	48	27	12	13
1975	13	7	13	14	39	41	46	37	37	12	10
1976	16	5	13	21	17	35	31	38	23	13	7
1977	15	4	10	12	25	36	31	33	38	17	13
1978	6	9	16	11	21	30	38	24	23	18	14
1979	11	10	11	9	14	24	24	38	37	12	12
1980	15	8	13	6	14	25	23	32	25	9	13
1981	20	9	17	15	6	20	34	35	35	16	17
1982	12	6	7	13	11	11	24	26	34	31	17
1983	14	8	3	10	16	20	15	28	28	21	18
1984	12	11	8	8	14	11	25	25	29	25	17
1985	10	8	5	16	9	11	23	17	26	25	15
1986	13	5	8	12	8	10	18	11	22	19	20
1987	10	12	9	12	9	10	11	22	21	10	18
1988	9	10	9	9	6	13	11	22	17	28	16
1989	11	7	16	10	12	11	15	15	15	20	30
1990	13	4	11	5	11	10	13	23	16	11	18
1991	8	7	15	7	1	5	12	14	20	14	26
1992	8	16	9	10	6	15	12	12	16	13	25
1993	17	16	12	14	7	9	8	19	20	12	20
1994	12	16	14	9	8	14	10	21	19	15	20
1995	20	19	16	22	17	10	11	17	16	17	14
1996	19	15	23	17	9	11	16	18	12	11	20
1997	21	14	12	21	11	10	11	9	12	14	22
1998	25	14	18	20	16	9	15	10	10	11	16
1999	23	13	17	17	10	6	12	8	21	18	15
2000	25	17	19	17	19	11	9	9	16	14	12
2001	21	13	12	16	8	15	11	11	17	14	21
2002	31	22	10	14	7	13	9	8	11	9	15
2003	27	14	7	17	5	12	11	12	17	14	33
2004	24	24	9	19	19	16	7	5	12	15	17
2005	16	16	19	13	11	11	5	7	12	6	13
2006	22	20	14	10	17	17	9	6	8	18	22
2007	30	9	14	10	6	14	8	12	8	10	24
2008	28	23	17	12	13	9	5	10	5	6	22
2009	31	15	24	12	11	10	13	6	7	8	19
2010	20	13	14	15	17	7	6	10	13	8	17
2011	28	28	21	12	12	12	5	8	10	6	22
2012	37	23	18	9	3	12	11	9	13	4	12
2013	20	26	21	11	15	16	8	12	10	15	12
2014	40	17	19	15	11	6	16	18	4	13	15
